# Supplementary material for: In situ catalyzed and nanoconfined magnesium hydride nanocrystals in a Ni-MOF scaffold for hydrogen storage
Source: Royal Society of Chemistry journal article supplement (doi:10.1039/d0se00818d), 2020-01-01
Supplement: d0se00818d1.pdf [file d0se00818d1.pdf]

## Electronic Supplementary Information

### In-situ catalyzed and nanoconfined magnesium hydride nanocrystals in a Ni-MOF scaffold for hydrogen storage

Zhewen Ma <sup>a</sup>, Qiuyu Zhang <sup>a,b,c</sup>, Subrata Panda <sup>a,b,c</sup>, Wen Zhu <sup>a</sup>, Fengzhan Sun <sup>a</sup>, Darvish Khan <sup>a</sup>,  
Jinjian Dong <sup>a</sup>, Wenjiang Ding <sup>a,b,c</sup>, Jianxin Zou <sup>a,b,c\*</sup>

<sup>a</sup> National Engineering Research Center of Light Alloys Net Forming & State Key Laboratory of Metal Matrix Composites, Shanghai Jiao Tong University, Shanghai, 200240, PR China;

<sup>b</sup> Shanghai Engineering Research Center of Mg Materials and Applications & School of Materials Science and Engineering, Shanghai Jiao Tong University, Shanghai, 200240, PR China

<sup>c</sup> Center of Hydrogen Science, Shanghai Jiao Tong University, Shanghai, 200240, PR China

### Supplementary Figures:

---

\*Corresponding author: Email: [zoujx@sjtu.edu.cn](mailto:zoujx@sjtu.edu.cn); Tel.: +86 21 54742381; Fax: +86 21 34203730.

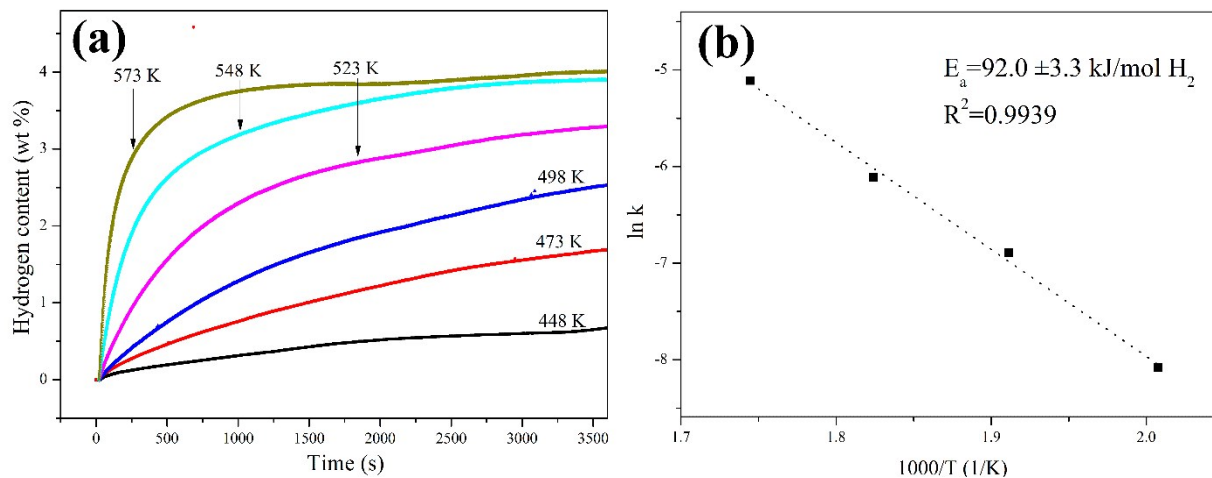

Fig. S1 (a) Isothermal hydriding profiles of the pure  $MgH_2$  (derived from  $MgBu_2$ ) and (b) the corresponding  $\ln k$  vs  $1000/T$  plot.

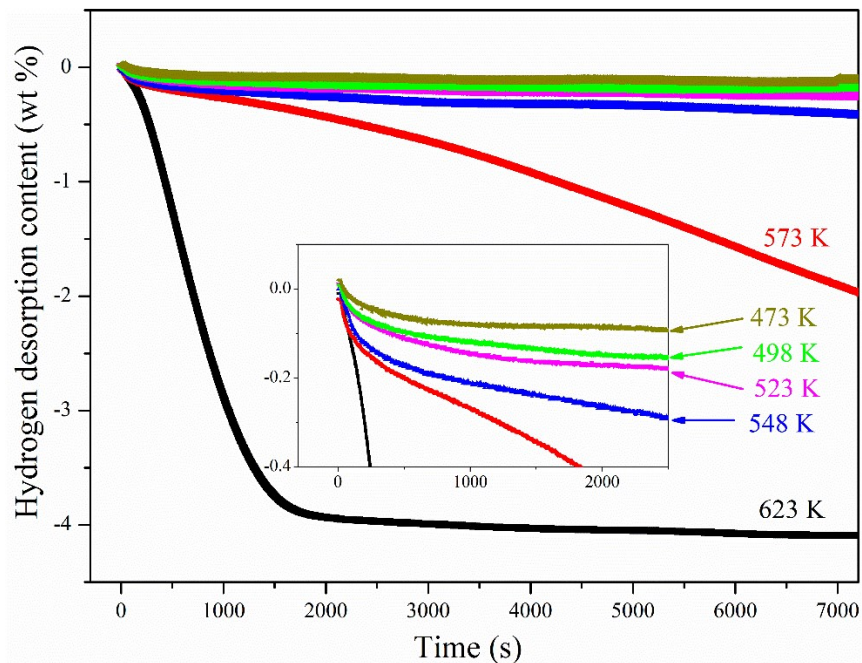

Fig. S2 Isothermal dehydriding profiles of the pure  $MgH_2$  (derived from  $MgBu_2$ ).

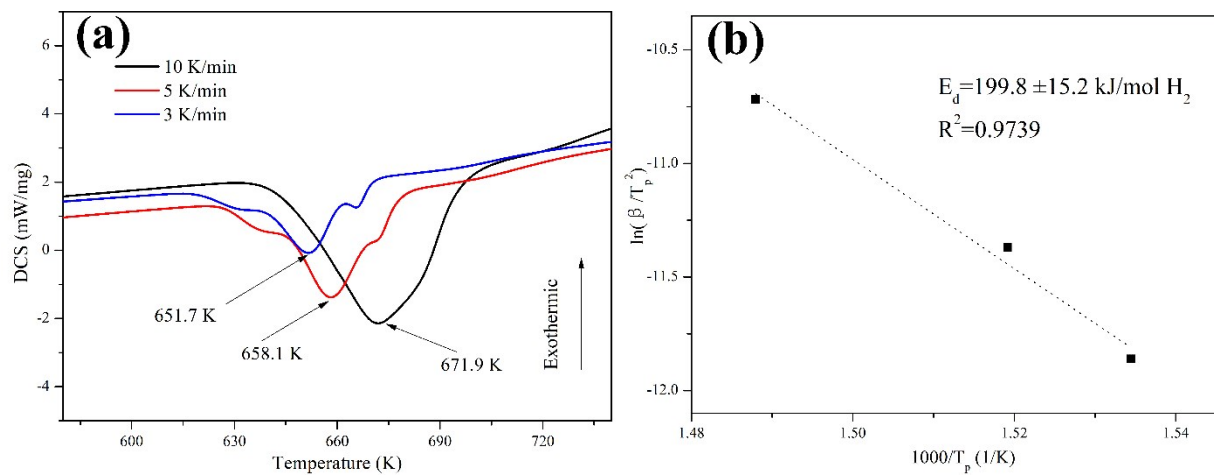

Fig. S3 (a) DSC curves obtained at different heating rates for the pure MgH<sub>2</sub> (derived from MgBu<sub>2</sub>) and (b) the corresponding  $\ln(\beta/T_p^2)$  vs  $1000/T_p$  plot.

**Supplementary Tables:**

Table S1 Pore structural parameters of the Ni-MOF scaffold determined by the N<sub>2</sub> sorption isotherms.

| Sample | BET surface area (m <sup>2</sup> g <sup>-1</sup> ) | Langmuir surface area (m <sup>2</sup> g <sup>-1</sup> ) | BJH average pore size (nm) | Pore volume (cm <sup>3</sup> g <sup>-1</sup> ) |
|--------|----------------------------------------------------|---------------------------------------------------------|----------------------------|------------------------------------------------|
| Ni-MOF | 773.46                                             | 921.67                                                  | 7.58                       | 0.4617                                         |

Table S2 PCT parameters at different temperatures subtracted from the PCT isotherms of MgH<sub>2</sub>@Ni-MOF composite.

| Sample                   | Temperature (K) | Hydrogen absorption capacity (wt%) | Hydrogen desorption capacity (wt%) | Absorption plateaus pressure (MPa) | Desorption plateaus pressure (MPa) |
|--------------------------|-----------------|------------------------------------|------------------------------------|------------------------------------|------------------------------------|
| MgH <sub>2</sub> @Ni-MOF | 598             | 4.03                               | 3.94                               | 0.47                               | 0.35                               |
|                          | 623             | 4.02                               | 3.91                               | 0.85                               | 0.64                               |
|                          | 648             | 3.95                               | 3.87                               | 1.31                               | 1.11                               |
|                          | 673             | 4.08                               | 3.97                               | 2.08                               | 1.68                               |
